# Supplementary material for: Odonata from Iberá Wetland System (Corrientes, Argentina) Are Regional Biogeographic Schemes Useful to Assess Odonata Biodiversity and Its Conservation?
Source: MDPI journal article supplement (doi:10.3390/d14100842), 2022-10-06
Supplement: s1 [file s1]

**Supplementary Data 1.** Checklist of Odonata per basin used in this paper. \*: new records for the Iberá Depression compared with Muzón *et al.* (2008): 1. Estero Ibera-Depresión Iberá; 2. Estero Carambolas-Depresión Iberá; 3. Naciente del Río; Corriente-Depresión Iberá; 4. Aguapey; 5. Cuenca de arroyos del Paraná; 6. Cuenca del Río Paraná hasta confluencia con Río Paraguay; 7. Cuencas menores de Corrientes afluentes del río Uruguay; 8. Estero Batel; 9. Estero Santa Lucia; 10. Miriñay; 11. Río Corriente.

|                                    | 1 | 2 | 3 | 4 | 5 | 6 | 7 | 8 | 9 | 10 | 11 |
|------------------------------------|---|---|---|---|---|---|---|---|---|----|----|
| <b>ANISOPTERA</b>                  |   |   |   |   |   |   |   |   |   |    |    |
| <b>AESHNIDAE</b>                   |   |   |   |   |   |   |   |   |   |    |    |
| <i>Anax amazili</i>                | 1 | 0 | 1 | 0 | 0 | 1 | 1 | 0 | 1 | 0  | 0  |
| <i>Coryphaeschna adnexa</i>        | 1 | 0 | 0 | 0 | 0 | 0 | 0 | 0 | 1 | 0  | 1  |
| * <i>Coryphaeschna perrensi</i>    | 0 | 1 | 0 | 0 | 1 | 0 | 1 | 1 | 1 | 0  | 0  |
| <i>Rhionaeschna bonariensis</i>    | 1 | 1 | 1 | 1 | 1 | 1 | 1 | 0 | 1 | 0  | 1  |
| <i>Rhionaeschna planaltica</i>     | 0 | 0 | 0 | 0 | 0 | 0 | 1 | 0 | 0 | 0  | 0  |
| <i>Staurophlebia reticulata</i>    | 0 | 0 | 0 | 0 | 1 | 0 | 1 | 0 | 0 | 0  | 1  |
| <i>Triacanthagyna nympha</i>       | 0 | 0 | 1 | 0 | 1 | 0 | 0 | 0 | 0 | 0  | 0  |
| <b>GOMPHIDAE</b>                   |   |   |   |   |   |   |   |   |   |    |    |
| <i>Aphylla distinguenda</i>        | 0 | 0 | 0 | 0 | 1 | 0 | 0 | 0 | 0 | 0  | 0  |
| <i>Aphylla producta</i>            | 0 | 0 | 0 | 0 | 0 | 0 | 1 | 0 | 0 | 0  | 1  |
| * <i>Aphylla theodorina</i>        | 0 | 1 | 1 | 0 | 0 | 0 | 1 | 0 | 0 | 0  | 0  |
| <i>Archaeogomphus infans</i>       | 0 | 0 | 0 | 0 | 0 | 0 | 1 | 0 | 0 | 0  | 0  |
| <i>Cyanogomphus waltheri</i>       | 0 | 0 | 0 | 0 | 0 | 0 | 1 | 0 | 0 | 0  | 0  |
| <i>Phyllocycla argentina</i>       | 0 | 0 | 0 | 0 | 1 | 0 | 0 | 0 | 0 | 0  | 0  |
| * <i>Phyllocycla propinqua</i>     | 0 | 0 | 1 | 0 | 1 | 0 | 0 | 0 | 0 | 0  | 0  |
| <i>Phyllocycla viridipleuris</i>   | 0 | 0 | 0 | 0 | 0 | 0 | 1 | 0 | 0 | 0  | 1  |
| <i>Progomphus aberrans</i>         | 0 | 0 | 0 | 0 | 0 | 1 | 0 | 0 | 0 | 0  | 0  |
| <i>Progomphus auropictus</i>       | 0 | 0 | 0 | 0 | 1 | 0 | 0 | 0 | 0 | 0  | 0  |
| <i>Progomphus basistictus</i>      | 0 | 0 | 0 | 0 | 1 | 0 | 0 | 0 | 0 | 0  | 0  |
| <i>Progomphus costalis</i>         | 0 | 0 | 0 | 0 | 1 | 0 | 0 | 0 | 0 | 0  | 0  |
| <i>Progomphus lepidus</i>          | 0 | 0 | 0 | 0 | 1 | 0 | 0 | 0 | 0 | 0  | 0  |
| <i>Tibiagomphus risi</i>           | 0 | 0 | 0 | 0 | 1 | 0 | 0 | 0 | 0 | 0  | 1  |
| <i>Tibiagomphus uncatus</i>        | 0 | 0 | 0 | 0 | 1 | 0 | 0 | 0 | 0 | 0  | 1  |
| <b>LIBELLULIDAE</b>                |   |   |   |   |   |   |   |   |   |    |    |
| <i>Brachymesia furcata</i>         | 0 | 0 | 0 | 0 | 0 | 0 | 0 | 0 | 1 | 0  | 1  |
| <i>Brachymesia herbida</i>         | 1 | 1 | 1 | 0 | 1 | 0 | 0 | 1 | 1 | 1  | 1  |
| <i>Dasythemis esmeralda</i>        | 0 | 0 | 0 | 0 | 0 | 0 | 1 | 0 | 0 | 0  | 0  |
| <i>Dasythemis venosa</i>           | 0 | 0 | 0 | 0 | 0 | 0 | 1 | 0 | 0 | 0  | 0  |
| <i>Diastatops intensa</i>          | 0 | 1 | 1 | 0 | 0 | 0 | 1 | 1 | 1 | 0  | 0  |
| <i>Diastatops obscura</i>          | 1 | 0 | 1 | 0 | 1 | 0 | 0 | 0 | 0 | 0  | 0  |
| <i>Diastatops pullata</i>          | 0 | 0 | 0 | 0 | 0 | 0 | 0 | 0 | 1 | 0  | 0  |
| <i>Dythemis nigra</i>              | 0 | 0 | 0 | 0 | 0 | 0 | 1 | 0 | 0 | 0  | 0  |
| <i>Edonis helena</i>               | 0 | 0 | 0 | 0 | 0 | 0 | 0 | 0 | 1 | 0  | 0  |
| * <i>Erythemis attala</i>          | 1 | 1 | 0 | 0 | 0 | 0 | 0 | 0 | 1 | 0  | 0  |
| <i>Erythemis credula</i>           | 1 | 1 | 1 | 0 | 0 | 1 | 0 | 1 | 1 | 0  | 1  |
| <i>Erythemis mithroides</i>        | 0 | 0 | 0 | 0 | 0 | 0 | 0 | 0 | 1 | 0  | 0  |
| <i>Erythemis peruviiana</i>        | 1 | 1 | 1 | 0 | 1 | 1 | 0 | 1 | 1 | 1  | 1  |
| <i>Erythemis plebeja</i>           | 1 | 1 | 1 | 0 | 1 | 1 | 0 | 1 | 1 | 1  | 1  |
| <i>Erythemis vesiculosa</i>        | 1 | 1 | 1 | 0 | 1 | 1 | 0 | 0 | 1 | 1  | 1  |
| <i>Erythrodiplax atroterminata</i> | 0 | 0 | 1 | 0 | 1 | 0 | 1 | 0 | 0 | 1  | 0  |
| <i>Erythrodiplax chromoptera</i>   | 0 | 0 | 0 | 0 | 0 | 0 | 1 | 0 | 0 | 0  | 0  |

[illegible]

|                                 |   |   |   |   |   |   |   |   |   |   |   |
|---------------------------------|---|---|---|---|---|---|---|---|---|---|---|
| <b>CALOPTERYGIDAE</b>           |   |   |   |   |   |   |   |   |   |   |   |
| <i>Hetaerina rosea</i>          | 1 | 0 | 1 | 0 | 1 | 1 | 1 | 0 | 0 | 0 | 1 |
| <i>Mnesarete grisea</i>         | 0 | 0 | 0 | 1 | 0 | 0 | 0 | 0 | 0 | 0 | 0 |
| <i>Mnesarete guttifera</i>      | 0 | 0 | 0 | 0 | 0 | 0 | 1 | 0 | 0 | 0 | 0 |
| <i>Mnesarete lencioni</i>       | 0 | 0 | 0 | 0 | 0 | 0 | 1 | 0 | 0 | 0 | 0 |
| <i>Mnesarete pruinosa</i>       | 0 | 0 | 0 | 0 | 1 | 0 | 0 | 0 | 0 | 0 | 0 |
| <i>Mnesarete pudica</i>         | 0 | 0 | 0 | 0 | 0 | 0 | 1 | 0 | 0 | 0 | 0 |
| <b>COENAGRIONIDAE</b>           |   |   |   |   |   |   |   |   |   |   |   |
| <i>*Acanthagrion aepiolum</i>   | 0 | 1 | 0 | 0 | 1 | 0 | 1 | 0 | 0 | 0 | 1 |
| <i>Acanthagrion cuyabae</i>     | 1 | 1 | 1 | 1 | 1 | 1 | 1 | 1 | 1 | 1 | 1 |
| <i>Acanthagrion gracile</i>     | 0 | 0 | 0 | 0 | 1 | 0 | 1 | 0 | 0 | 0 | 0 |
| <i>Acanthagrion lancea</i>      | 1 | 0 | 1 | 1 | 1 | 0 | 0 | 1 | 1 | 1 | 1 |
| <i>*Acanthagrion minutum</i>    | 0 | 0 | 1 | 0 | 0 | 1 | 0 | 0 | 0 | 0 | 0 |
| <i>Argentagrion ambiguum</i>    | 1 | 1 | 1 | 0 | 1 | 1 | 1 | 1 | 1 | 0 | 1 |
| <i>*Argia croceipennis</i>      | 0 | 0 | 1 | 0 | 1 | 0 | 1 | 0 | 0 | 0 | 1 |
| <i>Argia reclusa</i>            | 0 | 0 | 0 | 0 | 0 | 0 | 1 | 0 | 0 | 0 | 0 |
| <i>Argia serva</i>              | 0 | 0 | 0 | 0 | 1 | 0 | 0 | 0 | 0 | 0 | 1 |
| <i>Argia translata</i>          | 0 | 0 | 0 | 0 | 0 | 0 | 0 | 0 | 0 | 0 | 1 |
| <i>Cyanallagma bonariense</i>   | 0 | 0 | 0 | 0 | 0 | 0 | 1 | 0 | 0 | 1 | 0 |
| <i>Homeoura chelifera</i>       | 1 | 1 | 1 | 1 | 1 | 1 | 1 | 1 | 1 | 1 | 1 |
| <i>Homeoura lindneri</i>        | 1 | 0 | 1 | 0 | 1 | 1 | 0 | 1 | 0 | 0 | 1 |
| <i>Ischnura capreolus</i>       | 1 | 1 | 1 | 0 | 0 | 1 | 0 | 1 | 1 | 1 | 1 |
| <i>Ischnura fluviatilis</i>     | 1 | 1 | 1 | 0 | 1 | 1 | 1 | 1 | 1 | 1 | 1 |
| <i>Neoneura ethela</i>          | 0 | 0 | 0 | 0 | 1 | 0 | 1 | 0 | 0 | 0 | 1 |
| <i>Oxyagrion basale</i>         | 0 | 0 | 0 | 0 | 0 | 0 | 1 | 0 | 0 | 0 | 0 |
| <i>Oxyagrion chapadense</i>     | 0 | 0 | 0 | 0 | 1 | 0 | 1 | 0 | 0 | 0 | 0 |
| <i>*Oxyagrion rubidum</i>       | 1 | 0 | 0 | 0 | 0 | 0 | 0 | 0 | 0 | 1 | 1 |
| <i>Oxyagrion terminale</i>      | 0 | 0 | 0 | 0 | 0 | 0 | 1 | 0 | 0 | 0 | 1 |
| <i>Peristicta aeneoviridis</i>  | 0 | 0 | 0 | 0 | 1 | 0 | 1 | 0 | 0 | 0 | 1 |
| <i>Peristicta forceps</i>       | 0 | 0 | 0 | 0 | 1 | 0 | 0 | 0 | 0 | 0 | 1 |
| <i>Telagrion longum</i>         | 0 | 0 | 0 | 0 | 0 | 0 | 0 | 0 | 0 | 0 | 1 |
| <i>Telebasis griffinii</i>      | 1 | 1 | 0 | 0 | 0 | 0 | 0 | 1 | 0 | 0 | 0 |
| <i>*Telebasis obsoleta</i>      | 1 | 1 | 0 | 0 | 0 | 0 | 0 | 0 | 0 | 1 | 1 |
| <i>Telebasis simulacrum</i>     | 0 | 1 | 0 | 0 | 0 | 0 | 0 | 0 | 0 | 0 | 0 |
| <i>Telebasis willinki</i>       | 1 | 1 | 1 | 0 | 0 | 1 | 0 | 0 | 1 | 1 | 1 |
| <b>DICTERIADIDAE</b>            |   |   |   |   |   |   |   |   |   |   |   |
| <i>Heliogaris amazona</i>       | 0 | 0 | 0 | 0 | 0 | 0 | 1 | 0 | 0 | 0 | 0 |
| <b>HETERAGRIONIDAE</b>          |   |   |   |   |   |   |   |   |   |   |   |
| <i>Heteragrion aurantiacum</i>  | 0 | 0 | 0 | 1 | 1 | 0 | 1 | 0 | 0 | 0 | 0 |
| <b>LESTIDAE</b>                 |   |   |   |   |   |   |   |   |   |   |   |
| <i>Lestes dichrostigma</i>      | 0 | 0 | 0 | 1 | 0 | 0 | 0 | 0 | 0 | 0 | 1 |
| <i>Lestes forficula</i>         | 0 | 0 | 0 | 0 | 0 | 0 | 1 | 0 | 0 | 0 | 0 |
| <i>*Lestes minutus</i>          | 0 | 1 | 0 | 0 | 0 | 0 | 0 | 0 | 0 | 0 | 0 |
| <i>Lestes paulistus</i>         | 0 | 0 | 0 | 0 | 0 | 0 | 0 | 0 | 0 | 0 | 1 |
| <i>Lestes spatula</i>           | 1 | 1 | 0 | 0 | 0 | 0 | 0 | 0 | 0 | 1 | 1 |
| <b>MEGAPODAGRIONIDAE</b>        |   |   |   |   |   |   |   |   |   |   |   |
| <i>Allopodagrion brachyurum</i> | 0 | 0 | 0 | 0 | 1 | 0 | 0 | 0 | 0 | 0 | 0 |

**Supplementary Data 2.** List of georeferenced localities included in this study

|    | Province   | Locality                                                    | Lat      | Long     |
|----|------------|-------------------------------------------------------------|----------|----------|
| 1  | Corrientes | Curuzú Cuatiá, arroyo Vaca Cuá sobre RN 119                 | -29.6126 | -58.1188 |
| 2  | Corrientes | Goya, Ruta a Colonia Catalina (15 Km E Goya), charca        | -29.1651 | -59.0959 |
| 3  | Corrientes | Ruta Nacional 12, 10 Km al Este de Goya, charca             | -29.1538 | -59.1389 |
| 4  | Corrientes | Rio Santa Lucia                                             | -29.0786 | -59.2358 |
| 5  | Corrientes | Arroyo Pay Ubre Grande sobre RP 29                          | -29.0197 | -58.1744 |
| 6  | Corrientes | Paraje Batel, arroyo sin nombre sobre RN 12                 | -29.0055 | -58.8010 |
| 7  | Corrientes | Arroyo Pay Ubre Chico sobre RP 29                           | -28.9918 | -58.1905 |
| 8  | Corrientes | Chavarría                                                   | -28.9553 | -58.5717 |
| 9  | Corrientes | Rio Miriñay, estero-bañado                                  | -28.9169 | -57.2364 |
| 10 | Corrientes | San Diego                                                   | -28.7514 | -58.6531 |
| 11 | Corrientes | Estancia El Dorado                                          | -28.7429 | -58.1267 |
| 12 | Corrientes | Estancia El Dorado, casco                                   | -28.7427 | -58.1268 |
| 13 | Corrientes | 31 km de Colonia Pellegrini, Ruta provincial 40             | -28.6897 | -57.4358 |
| 14 | Corrientes | Estancia El Socorro, Casa de Biólogos                       | -28.6881 | -57.4342 |
| 15 | Corrientes | Esteros del Ibera, camino entre Casa de Biólogos y el Hotel | -28.6542 | -57.4295 |
| 16 | Corrientes | Estancia El Socorro, tajamar                                | -28.6495 | -57.4161 |
| 17 | Corrientes | Estancia El Socorro, borde de estero 1                      | -28.6353 | -57.4650 |
| 18 | Corrientes | Estancia El Socorro, borde de estero 2                      | -28.6289 | -57.4184 |
| 19 | Corrientes | Estancia Rincón del Socorro, Puesto Cerrito (tajamar)       | -28.6091 | -57.3021 |
| 20 | Corrientes | San Roque                                                   | -28.5744 | -58.7092 |
| 21 | Corrientes | Estancia Rincón del Socorro, Lobo Cuá                       | -28.5570 | -57.2083 |
| 22 | Corrientes | Lobo Cuá, charcas, tajamar                                  | -28.5508 | -57.2125 |
| 23 | Corrientes | Colonia Pellegrini, Laguna Ibera                            | -28.5381 | -57.1866 |
| 24 | Corrientes | Colonia Pellegrini, Laguna Ibera (Bañado)                   | -28.5378 | -57.1867 |
| 25 | Corrientes | Estancia El Tránsito, arroyo Carambolitas                   | -28.4438 | -57.6911 |
| 26 | Corrientes | Charcas camino Estancia El Tránsito                         | -28.4398 | -57.8029 |
| 27 | Corrientes | Estancia El Tránsito, charcas                               | -28.4225 | -57.6962 |
| 28 | Corrientes | Rio Aguapey sobre RP 40                                     | -28.4169 | -56.5425 |
| 29 | Corrientes | Camino a la Estancia El Transito, cuenca Gallo-Sapucay      | -28.3949 | -57.8620 |
| 30 | Corrientes | Arroyo Batel y Ruta Provincial 6                            | -28.3015 | -58.0412 |
| 31 | Corrientes | Arroyo Batel sobre RP 6                                     | -28.2942 | -58.0314 |
| 32 | Corrientes | Santo Rosa                                                  | -28.2684 | -58.1237 |
| 33 | Corrientes | Mercedes, Estancia El Dorado                                | -28.2428 | -58.1267 |
| 34 | Corrientes | Garaví, diversos ambientes sobre RP 94                      | -28.2290 | -55.8096 |
| 35 | Corrientes | Garaví, charca sobre RP 94, entrada Sur a Garaví            | -28.2254 | -55.8000 |
| 36 | Corrientes | Arroyo Carambolas, Estancia San Nicolás                     | -28.1846 | -57.4429 |
| 37 | Corrientes | Arroyo Carambolas                                           | -28.1846 | -57.5069 |
| 38 | Corrientes | Garruchos                                                   | -28.1736 | -55.6511 |
| 39 | Corrientes | Estancia San Nicolás, casco                                 | -28.1281 | -57.4343 |
| 40 | Corrientes | Paso Aguirre, bañado y borde de la laguna                   | -28.1214 | -58.1485 |
| 41 | Corrientes | Laguna Galarza, canal de acceso                             | -28.0947 | -56.6866 |
| 42 | Corrientes | Arroyo Chimiray sobre RP 94                                 | -28.0910 | -55.7066 |
| 43 | Corrientes | Canal sin nombre, RN 118, km 107                            | -28.0792 | -57.7772 |
| 44 | Corrientes | Galarza, arroyo Yacaré (desembocadura)                      | -28.0594 | -56.7012 |

|    |            |                                                                    |          |          |
|----|------------|--------------------------------------------------------------------|----------|----------|
| 45 | Corrientes | Gobernador Virasoro                                                | -28.0501 | -56.0334 |
| 46 | Corrientes | Mburucuyá National Park, central station                           | -28.0500 | -58.2333 |
| 47 | Misiones   | Ruta 1 km 68.5, N of Azara                                         | -28.0500 | -55.7000 |
| 48 | Corrientes | Virasoro                                                           | -28.0467 | -56.0097 |
| 49 | Corrientes | Parque Nacional Mburucuyá, charcas sobre RP 86                     | -28.0372 | -58.1029 |
| 50 | Corrientes | Parque Nacional Mburucuyá, arroyo El Portillo sobre RP 86          | -28.0364 | -58.1093 |
| 51 | Corrientes | Parque Nacional Mburucuyá, sendero de 4 km                         | -28.0343 | -58.0293 |
| 52 | Misiones   | 5 km de Azara (km 68,5)                                            | -28.0247 | -55.7072 |
| 53 | Corrientes | Camino a Estancia San Nicolás                                      | -28.0070 | -57.5069 |
| 54 | Misiones   | Arroyo Concepción, 23 km E de Apóstoles junto a ruta 2             | -27.9739 | -55.5656 |
| 55 | Misiones   | Arroyo León y ruta provincial 2                                    | -27.9333 | -55.6162 |
| 56 | Misiones   | Arroyo León sobre RP 10                                            | -27.9325 | -55.6179 |
| 57 | Corrientes | Manantiales                                                        | -27.9281 | -58.1029 |
| 58 | Corrientes | Manantiales                                                        | -27.9218 | -58.0858 |
| 59 | Corrientes | Manantiales                                                        | -27.9218 | -58.0996 |
| 60 | Misiones   | Ruta 2, Km 13, charca con chorrillo                                | -27.9156 | -55.6385 |
| 61 | Misiones   | Apóstoles, RP 10, Km 13, charca con chorrillo                      | -27.9154 | -55.6394 |
| 62 | Misiones   | Apóstoles                                                          | -27.9131 | -55.7519 |
| 63 | Misiones   | Charca sobre RP 2, Km 34                                           | -27.9041 | -55.4270 |
| 64 | Misiones   | Santa María, Concepción                                            | -27.9000 | -55.3833 |
| 65 | Corrientes | Paso Moreno, juncal sobre RP 22 (tamborcito de Tacuarí)            | -27.8140 | -57.0826 |
| 66 | Corrientes | Paso Moreno, juncal                                                | -27.8130 | -57.0787 |
| 67 | Misiones   | Arroyo Pindapoy II sobre RP 1                                      | -27.7776 | -55.7731 |
| 68 | Misiones   | Apóstoles, San José                                                | -27.7697 | -55.7803 |
| 69 | Misiones   | Pindapoy                                                           | -27.7489 | -55.7914 |
| 70 | Corrientes | Estancia San Juan de Poriahú, borde del estero                     | -27.7436 | -57.1668 |
| 71 | Corrientes | Bañado con charca central sobre RP 22 (Tamborcito de Tacuarí)      | -27.7400 | -56.9941 |
| 72 | Corrientes | Estancia San Juan de Poriahú, camino a estero                      | -27.7181 | -57.1851 |
| 73 | Corrientes | Ituzaingó, Estancia San Juan de Poriahú, Laguna                    | -27.7142 | -57.1872 |
| 74 | Corrientes | Estancia San Juan de Poriahú, laguna y chorrillo                   | -27.7106 | -57.1879 |
| 75 | Corrientes | Estancia San Juan de Poriahú, laguna y chorrillo                   | -27.7004 | -57.1969 |
| 76 | Misiones   | Arroyo Anyico y ruta nacional 14                                   | -27.6992 | -55.6635 |
| 77 | Corrientes | Charcas sobre RP 22 (Tamborcito de Tacuarí)                        | -27.6819 | -56.9284 |
| 78 | Misiones   | Arroyo Liso sobre RN 14                                            | -27.6740 | -55.6207 |
| 79 | Misiones   | Arroyo sobre RN14                                                  | -27.6683 | -55.6091 |
| 80 | Misiones   | Arroyo Anyico, by Ruta 14 between Cerro Azul and San Jose          | -27.6647 | -55.6092 |
| 81 | Misiones   | Arroyo Anyico sobre RN 14                                          | -27.6645 | -55.6089 |
| 82 | Corrientes | Santa Tecla, 15 Km al Este de Ituzaingó                            | -27.6168 | -56.3938 |
| 83 | Corrientes | Ituzaingó                                                          | -27.5858 | -56.6899 |
| 84 | Corrientes | Ituzaingó, Yaciretá                                                | -27.5785 | -56.6831 |
| 85 | Misiones   | Charca sobre RN 105, 20 km N de San José                           | -27.5239 | -55.8579 |
| 86 | Corrientes | Reserva Natural Rincón de Santa María, cunetas                     | -27.5020 | -56.5875 |
| 87 | Corrientes | RN 12, 10 km N desvío a Cerrito                                    | -27.4866 | -57.2844 |
| 88 | Corrientes | Ituzaingó, Natural Reserve Rincón de Santa María, artificial ponds | -27.4731 | -56.5772 |
| 89 | Corrientes | Reserva Natural Rincón de Santa María, tajamar                     | -27.4731 | -56.5744 |
| 90 | Corrientes | Arroyo Santa Isabel, sobre RN 12 (km 1169)                         | -27.4693 | -57.4881 |

|     |            |                                                 |          |          |
|-----|------------|-------------------------------------------------|----------|----------|
| 91  | Misiones   | Garupá, arroyo Garupá                           | -27.4630 | -55.8199 |
| 92  | Corrientes | Al sur de Cruz del Peregrino                    | -27.4619 | -57.6583 |
| 93  | Misiones   | Posadas, Itaembé                                | -27.4548 | -56.0510 |
| 94  | Corrientes | Santa Ana                                       | -27.4500 | -58.6667 |
| 95  | Misiones   | Posadas, Área de Recursos Ambientales El Zaimán | -27.4367 | -55.8971 |
| 96  | Misiones   | Posadas, Zaiman                                 | -27.4295 | -55.9006 |
| 97  | Misiones   | Posadas                                         | -27.3901 | -55.9170 |
| 98  | Misiones   | Arroyo Santa Ana                                | -27.3828 | -55.6070 |
| 99  | Misiones   | Posadas                                         | -27.3621 | -55.9009 |
| 100 | Misiones   | Posadas, Arroyo Ita (Urquiza y Tomás Guido)     | -27.3592 | -55.9106 |
| 101 | Misiones   | Alto Paraná, Santa Ana                          | -27.3500 | -55.6000 |
| 102 | Corrientes | San Cosme Departamento Paso de la Patria        | -27.3167 | -58.5833 |
| 103 | Corrientes | Itatí, Departamento Itatí                       | -27.2667 | -58.2500 |
